# Supplementary material for: Revealing the Impact of Structural Variants in Multiple Myeloma
Source: Oxford University Press journal article supplement (doi:10.1158/2643-3230.bcd-20-0132), 2020-09-15
Supplement: 26433230bcd200132-sup-248108_2_supp_6544888_qg1rtv.xlsx [file 26433230bcd200132-sup-248108_2_supp_6544888_qg1rtv.xlsx]

## Sheet: Sheet 1
hotspot.id	chrom	start	end	length	cytoband	patients_with_SV	chromoplexy	chromothripsis	complex	templated_insertion	DUP	TRA	DEL	INV	hotspot_class	driver_status	genes_involved	reference
down_chr1_51.4Mb	1	51434001	51478000	43999	p32.3	21	0	2	1	0	0	0	14	0	LOSS	KNOWN	CDKN2C|FAF1	18829482|20616218|19597341|27531699|26056298|29209042
down_chr1_92.8Mb	1	92783001	92894000	110999	p22.1	8	0	0	1	0	0	0	5	2	LOSS	KNOWN	RPL5	27909306
nonClustered_chr1_118.2Mb	1	118151180	118629757	478577	p12	46	0	3	4	10	0	5	14	9	LOSS	KNOWN	FAM46C	31015454|21994415|28619709|27531699|31444325|24429703|24434212|26282654|24518206
nonClustered_chr1_150.5Mb	1	150474795	153228445	2753650	q21.3	23	0	5	0	6	7	0	0	4	GAIN	NEW	MCL1
down_chr1_160.2Mb	1	160247001	161160000	912999	q23.2;q23.3	21	0	4	0	4	12	1	0	0	GAIN	NEW	SLAMF7
nonClustered_chr1_203.2Mb	1	203219770	203329391	109621	q32.1	11	0	1	0	5	5	0	0	0	GAIN	NEW	BTG2	23446999|16728703
down_chr2_64.4Mb	2	64360001	65022000	661999	p14	30	0	0	0	11	15	0	0	1	GAIN	UNKNOWN		24434212
down_chr2_70.3Mb	2	70301001	70704000	402999	p13.3	13	0	1	1	3	8	0	0	0	GAIN	UNKNOWN
down_chr2_174.8Mb	2	174823001	175264000	440999	q31.1	15	0	3	2	0	0	0	8	1	LOSS	KNOWN	SP3
down_chr2_231.1Mb	2	231109001	231175000	65999	q37.1	16	0	1	1	0	0	0	14	0	LOSS	KNOWN	SP140	27531699|24429703|24434212|31444325|29209042
nonClustered_chr3_46Mb	3	45997188	46978074	980886	p21.31	15	0	0	0	10	5	0	0	0	GAIN	NEW	CCR2	12644822
nonClustered_chr3_53.1Mb	3	53083678	54136778	1053100	p21.1	18	0	0	0	9	8	1	0	0	GAIN	NEW	PRKCD
nonClustered_chr3_58.8Mb	3	58816783	61286691	2469908	p14.2	20	0	1	1	0	0	0	16	1	FRAGILE	FRAGILE	FHIT	16313263|24434212
nonClustered_chr3_140.9Mb	3	140913829	141288349	374520	q23	14	0	1	0	3	6	0	0	2	GAIN	KNOWN	RASA2|ZBTB38	29209042|29884741|24429703
nonClustered_chr3_169Mb	3	168962866	169718062	755196	q26.2	22	0	1	0	9	9	0	0	1	GAIN	KNOWN	SEC62|SAMD7	31015454||24434212
down_chr3_176.8Mb	3	176800001	176843000	42999	q26.32	10	0	0	0	0	0	0	10	0	LOSS	UNKNOWN
down_chr4_1.9Mb	4	1857001	1920000	62999	p16.3	91	3	2	0	1	0	85	0	0	GAIN	KNOWN	WHSC1|FGFR3	31015454|27531699|31444325|24434212|26282654|22529291
down_chr4_91Mb	4	91025001	92014000	988999	q22.1	24	0	0	0	0	0	0	23	0	FRAGILE	FRAGILE	CCSER1
down_chr4_153.4Mb	4	153416001	153628000	211999	q31.3	15	0	0	0	10	5	0	0	0	GAIN	NEW	FBXW7	22388891|29654271|31015454|32350066
nonClustered_chr4_185.1Mb	4	185118704	185454751	336047	q35.1	11	0	0	0	5	5	1	0	0	GAIN	NEW	IRF2
down_chr5_112.5Mb	5	112497001	112821000	323999	q22.2	8	0	0	0	3	5	0	0	0	GAIN	UNKNOWN
nonClustered_chr5_138.4Mb	5	138434801	139687445	1252644	q31.2;q31.3	22	0	1	0	8	12	1	0	0	GAIN	NEW	NRG2|UBE2D2	18094409
nonClustered_chr5_156.1Mb	5	156078201	157156340	1078139	q33.3	24	0	0	0	11	12	1	0	0	GAIN	NEW	SOX30
down_chr6_0.2Mb	6	216001	402000	185999	p25.3	11	0	0	0	5	4	1	0	0	GAIN	KNOWN	IRF4	22495321|26282654|27223072|31444325|24434212|29209042
down_chr6_7.7Mb	6	7732001	8156000	423999	p24.3	48	0	1	1	30	8	7	0	1	GAIN	KNOWN	BMP6|TXNDC5	31015454|14691444|24434212|24518206
nonClustered_chr6_11.1Mb	6	11102046	11552032	449986	p24.2	14	0	0	0	5	7	1	0	1	GAIN	NEW	NEDD9
nonClustered_chr6_41.9Mb	6	41910170	42003789	93619	p21.1	11	0	0	1	3	0	7	0	0	GAIN	KNOWN	CCND3	27531699
nonClustered_chr6_106.2Mb	6	106203086	106631817	428731	q21	11	0	0	0	5	5	1	0	0	GAIN	UNKNOWN		31015454|27363682|24518206|24434212|29209042|29654271
down_chr6_108.9Mb	6	108948001	109298000	349999	q21	31	0	0	0	17	12	2	0	0	GAIN	KNOWN	FOXO3	31015454|24518206
down_chr6_155.1Mb	6	155071001	155708000	636999	q25.2;q25.3	9	1	1	1	0	0	1	4	1	LOSS	UNKNOWN
down_chr7_7.9Mb	7	7919001	8007000	87999	p21.3	8	0	0	0	4	4	0	0	0	GAIN	NEW	GLCCI1
down_chr7_26.1Mb	7	26147001	26716000	568999	p15.2	12	0	2	0	4	6	0	0	0	GAIN	UNKNOWN
nonClustered_chr7_139.5Mb	7	139484536	139725587	241051	q34	11	0	0	0	6	4	1	0	0	GAIN	NEW	TBXAS1|HIPK2
nonClustered_chr8_126.3Mb	8	126259109	126421600	162491	q24.13	41	1	2	5	4	5	2	14	4	GAIN	KNOWN	NSMCE2|MYC	24518206
nonClustered_chr8_128Mb	8	128019456	129728865	1709409	q24.21	270	1	15	15	131	34	33	24	7	GAIN	KNOWN	MYC|PVT1	31015454|27531699|24518206
nonClustered_chr9_0.3Mb	9	349290	1202150	852860	p24.3	8	0	0	0	5	2	0	0	1	GAIN	UNKNOWN
down_chr9_9Mb	9	8988001	10075000	1086999	p24.1;p23	35	0	1	0	0	0	0	32	0	FRAGILE	FRAGILE	PTPRD	24434212|22529291
down_chr9_20.9Mb	9	20916001	22006000	1089999	p21.3	20	2	1	2	0	0	1	13	1	LOSS	KNOWN	CDKN2A|CDKN2B	11815963|17244692
down_chr10_103.9Mb	10	103899001	104638000	738999	q24.32	27	0	6	3	1	0	2	9	1	LOSS	UNKNOWN		17692805|31444325|18025196
down_chr10_112.1Mb	10	112091001	112653000	561999	q25.2	12	0	0	0	3	8	0	0	0	GAIN	UNKNOWN
nonClustered_chr11_65.3Mb	11	65304588	65759960	455372	q13.1	19	0	1	0	8	8	0	0	1	GAIN	UNKNOWN
down_chr11_69Mb	11	68972001	69912000	939999	q13.3	137	0	3	6	35	1	86	0	2	GAIN	KNOWN	CCND1	31015454|27531699|31444325|24429703|24434212|26282654
down_chr11_72.8Mb	11	72826001	73019000	192999	q13.4	27	0	0	0	15	8	2	0	1	GAIN	KNOWN	P2RY2|FCHSD2	31015454|
down_chr11_99.7Mb	11	99676001	100251000	574999	q22.1	15	0	2	1	0	0	0	10	2	FRAGILE	FRAGILE	CNTN5	25628468|28234347|22495321|24434212|22529291|17692805
nonClustered_chr11_110.9Mb	11	110942859	111359413	416554	q23.1	16	0	2	0	4	7	0	0	1	GAIN	NEW	POU2AF1	17621271|16001433
down_chr12_4.2Mb	12	4177001	4376000	198999	p13.32	14	0	2	0	6	1	5	0	0	GAIN	KNOWN	CCND2	31015454|30545397
nonClustered_chr12_6.5Mb	12	6492606	7355842	863236	p13.31	14	0	1	1	8	2	2	0	0	GAIN	KNOWN	LTBR|LAG3	17692805
nonClustered_chr12_12.9Mb	12	12883685	13636826	753141	p13.1	11	0	1	2	0	0	1	4	2	LOSS	KNOWN	CDKN1B	18829482
down_chr13_48.9Mb	13	48856001	49088000	231999	q14.2	20	0	0	2	0	0	0	18	0	LOSS	KNOWN	RB1	28234347|24434212|26282654|31444325|29209042
down_chr14_65.5Mb	14	65529001	65572000	42999	q23.3	13	0	0	0	0	0	0	13	0	LOSS	KNOWN	MAX	27903915|31444325|31015454|24434212|26282654|29884741
nonClustered_chr14_69.3Mb	14	69257724	69282970	25246	q24.1	12	0	0	0	0	0	0	9	2	LOSS	UNKNOWN
down_chr14_103.2Mb	14	103228001	103382000	153999	q32.32	42	1	1	1	0	0	0	36	0	LOSS	KNOWN	TRAF3	25628468|29884741|17692805|31444325|24429703|24434212|26282654
nonClustered_chr15_31.5Mb	15	31492673	31745187	252514	q13.3	11	0	0	0	2	9	0	0	0	GAIN	NEW	KLF13
nonClustered_chr15_52.8Mb	15	52789977	53113158	323181	q21.2;q21.3	9	0	0	0	3	5	0	0	1	GAIN	UNKNOWN
nonClustered_chr15_63.7Mb	15	63724827	64018515	293688	q22.31	16	0	0	0	7	3	3	0	2	GAIN	NEW	USP3|HERC1
down_chr15_75.1Mb	15	75059001	76029000	969999	q24.1;q24.2	23	0	1	0	10	10	0	0	1	GAIN	UNKNOWN		24434212|29884741
nonClustered_chr15_85.3Mb	15	85261344	86000757	739413	q25.3	10	0	0	1	3	3	1	0	2	GAIN	UNKNOWN
down_chr16_11.8Mb	16	11796001	12121000	324999	p13.13	19	1	2	3	6	5	2	0	0	GAIN	NEW	TNFRSF17	31015454|27313079|14707116
down_chr16_50.6Mb	16	50644001	50914000	269999	q12.1	20	1	2	6	0	0	1	6	3	LOSS	KNOWN	CYLD	25628468|31444325|29209042|17692805
down_chr16_78.6Mb	16	78588001	79240000	651999	q23.1;q23.2	27	0	0	2	6	0	19	0	0	GAIN	KNOWN	MAF/WWOX	31015454|27531699|22495321|22529291
nonClustered_chr17_3.8Mb	17	3767127	4656055	888928	p13.2	23	1	0	1	6	12	3	0	0	GAIN	UNKNOWN
nonClustered_chr17_7.1Mb	17	7060397	8487795	1427398	p13.1	19	1	1	1	0	0	2	11	2	LOSS	KNOWN	TP53	27531699|29884741|24429703|24434212|26282654|31444325|22529291
down_chr17_16.8Mb	17	16819001	17144000	324999	p11.2	19	0	3	1	6	6	1	0	1	GAIN	NEW	TNFRSF13B	30135465|27531699
nonClustered_chr17_38.9Mb	17	38900052	40797703	1897651	q21.2	29	0	8	4	7	3	0	3	2	LOSS	UNKNOWN
down_chr17_43.3Mb	17	43316001	43452000	135999	q21.31	31	1	3	1	14	3	9	0	0	GAIN	KNOWN	MAP3K14	31015454|17692805|29654271|28234347
nonClustered_chr19_10.2Mb	19	10192534	11148210	955676	p13.2	20	0	1	0	4	8	3	0	3	GAIN	UNKNOWN		23586898|31015454|24434212
down_chr19_15.8Mb	19	15847001	16559000	711999	p13.12;p13.11	25	0	1	1	15	4	2	0	2	GAIN	KNOWN	KLF2	31015454|26728187
nonClustered_chr20_17.7Mb	20	17718933	18136892	417959	p12.1;p11.23	10	1	0	0	4	2	1	0	1	GAIN	UNKNOWN
down_chr20_32.4Mb	20	32410001	35594000	3183999	q11.22;q11.23	50	2	7	0	16	19	1	0	1	GAIN	UNKNOWN		31015454|16155016|24434212
down_chr20_46Mb	20	46032001	46091000	58999	q13.12	11	0	2	0	4	5	0	0	0	GAIN	UNKNOWN		7535594|31015454|17692805
nonClustered_chrX_7Mb	X	6981163	7712510	731347	p22.31	13	1	1	0	0	0	0	11	0	LOSS	UNKNOWN
down_chrX_44.3Mb	X	44348001	44803000	454999	p11.3	10	0	0	0	0	0	0	10	0	LOSS	KNOWN	KDM6A	29045832|24429703|25288879
nonClustered_chrX_95.9Mb	X	95921253	97208011	1286758	q21.33	34	1	1	0	0	0	1	30	0	FRAGILE	FRAGILE	RPA4|DIAPH2|RBSG1
